# Supplementary material for: Olive Mill Wastewater Fermented with Microbial Pools as a New Potential Functional Beverage
Source: MDPI journal article supplement (doi:10.3390/molecules28020646), 2023-01-08
Supplement: s1 [file s1]

**Table S1.** Chemical parameters detected in samples of Trial I and Trial II. **Table S2.** Main microbial groups counted in Trial I and Trial II samples during fermentation. **Table S3.** Evaluation of tested samples inhibition (as %) on COXs enzymes.

**Figure S1.** Evaluation of inhibition (as %) of different HT concentrations on oCOX-1 and hCOX-2. **Figure S2.** a) Trial I at the end of fermentation; b) Cartons filters after the spinning process and samples from trial II; c) Sample of Trial II after the fermentation process. **Figure S3.** OMWW samples microfiltered at 0.22  $\mu\text{m}$ .

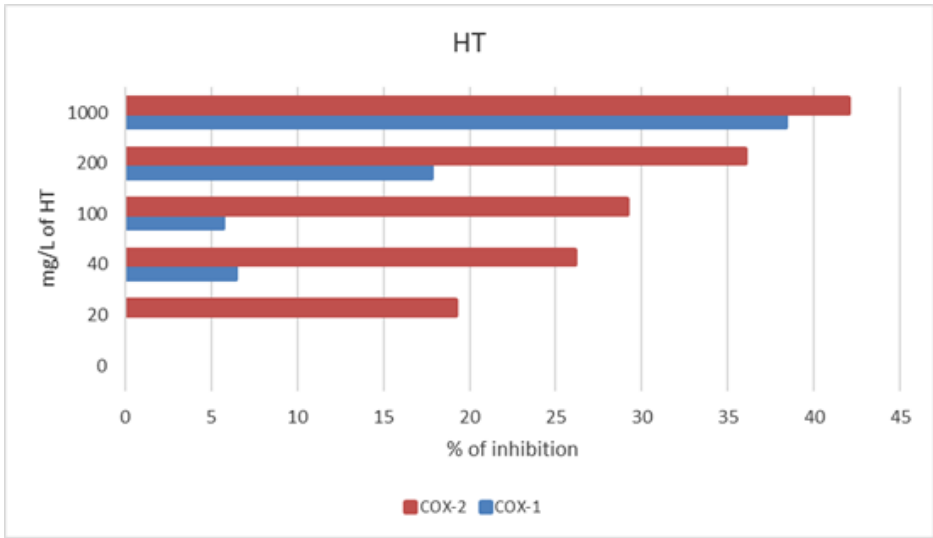

Figure S1

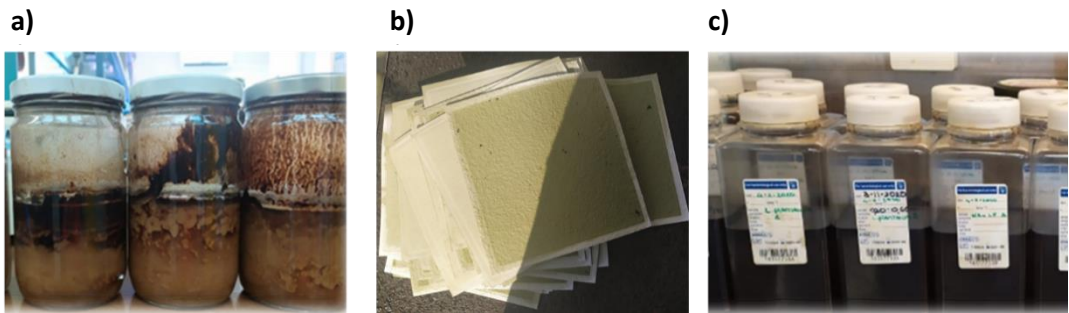

Figure S2

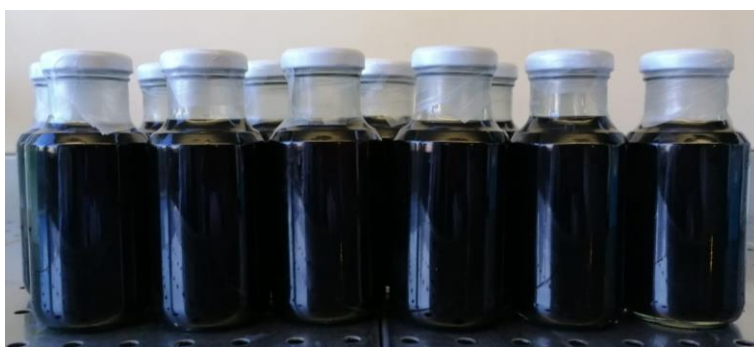

Figure S3

Table S1

| Sample              | Time (days) | pH                        | TSS (°Brix)               | Total phenol (mg/L)          | HT (mg/L)                     | TYR (mg/L)                  |
|---------------------|-------------|---------------------------|---------------------------|------------------------------|-------------------------------|-----------------------------|
| <b>Trial I</b>      |             |                           |                           |                              |                               |                             |
| <i>Control</i>      | 0           | 5.05 ± 0.01               | 7.77 ± 0.02 <sup>b</sup>  | 2449.8 ± 0.25 <sup>d</sup>   | 410.1 ± 4.43 <sup>a</sup>     | 76.4 ± 0.46 <sup>a</sup>    |
| <i>L. plantarum</i> | 0           | 5.02 ± 0.01               | 7.72 ± 0.01 <sup>b</sup>  | 2596.0 ± 1.42 <sup>b</sup>   | 285.4 ± 42.61 <sup>bc</sup>   | 68.2 ± 0.82 <sup>bc</sup>   |
| <i>C. boidinii</i>  | 0           | 5.01 ± 0.01               | 7.73 ± 0.08 <sup>b</sup>  | 2515.9 ± 0.15 <sup>c</sup>   | 415.2 ± 14.38 <sup>a</sup>    | 54.7 ± 1.49 <sup>d</sup>    |
| <i>W. anomalous</i> | 0           | 5.01 ± 0.01               | 8.21 ± 0.02 <sup>a</sup>  | 2638.4 ± 0.59 <sup>b</sup>   | 373.9 ± 14.19 <sup>a</sup>    | 52.5 ± 3.28 <sup>d</sup>    |
| <i>L.p+ W.a</i>     | 0           | 5.02 ± 0.02               | 7.08 ± 0.01 <sup>c</sup>  | 2459.4 ± 0.79 <sup>c</sup>   | 345.2 ± 14.90 <sup>ab</sup>   | 61.5 ± 0.52 <sup>c</sup>    |
| <i>L.p+C.b</i>      | 0           | 5.03 ± 0.01               | 8.32 ± 0.08 <sup>a</sup>  | 2654.7 ± 1.80 <sup>b</sup>   | 105.2 ± 2.66 <sup>d</sup>     | 54.3 ± 2.29 <sup>d</sup>    |
| <i>L.p+W.a+C.b</i>  | 0           | 5.10 ± 0.14               | 8.19 ± 0.11 <sup>a</sup>  | 2744.9 ± 0.02 <sup>a</sup>   | 229.5 ± 6.62 <sup>c</sup>     | 74.6 ± 1.01 <sup>ab</sup>   |
|                     |             | n.s                       | **                        | **                           | **                            | **                          |
| <i>Control</i>      | 8           | 4.85 ± 0.01 <sup>a</sup>  | 6.27 ± 0.08 <sup>a</sup>  | 2037.5 ± 2.08 <sup>d</sup>   | 252.5 ± 1.05 <sup>b</sup>     | 89.8 ± 6.42                 |
| <i>L. plantarum</i> | 8           | 4.76 ± 0.03 <sup>ab</sup> | 5.65 ± 0.06 <sup>b</sup>  | 1584.7 ± 0.41 <sup>c</sup>   | 174.6 ± 2.06 <sup>d</sup>     | 88.8 ± 3.14                 |
| <i>C. boidinii</i>  | 8           | 4.45 ± 0.07 <sup>c</sup>  | 5.79 ± 0.02 <sup>b</sup>  | 2893.4 ± 7.62 <sup>a</sup>   | 305.2 ± 14.17 <sup>a</sup>    | 98.2 ± 7.38                 |
| <i>W. anomalous</i> | 8           | 4.82 ± 0.03 <sup>a</sup>  | 5.73 ± 0.09 <sup>b</sup>  | 2336.3 ± 0.41 <sup>b</sup>   | 224.4 ± 0.93 <sup>c</sup>     | 113.1 ± 16.44               |
| <i>L.p+ W.a</i>     | 8           | 4.69 ± 0.01 <sup>b</sup>  | 5.19 ± 0.01 <sup>c</sup>  | 2363.6 ± 3.39 <sup>b</sup>   | 267.9 ± 2.20 <sup>b</sup>     | 112.7 ± 4.63                |
| <i>L.p+C.b</i>      | 8           | 4.76 ± 0.01 <sup>ab</sup> | 6.19 ± 0.05 <sup>a</sup>  | 2047.2 ± 6.69 <sup>d</sup>   | 266.8 ± 3.65 <sup>b</sup>     | 103.2 ± 1.76                |
| <i>L.p+W.a+C.b</i>  | 8           | 4.64 ± 0.01 <sup>b</sup>  | 6.16 ± 0.08 <sup>a</sup>  | 2191.8 ± 2.49 <sup>c</sup>   | 300.0 ± 3.08 <sup>a</sup>     | 108.9 ± 2.12                |
|                     |             | **                        | **                        | ***                          | *                             | n.s                         |
| <i>Control</i>      | 30          | 4.99 ± 0.02 <sup>b</sup>  | 6.31 ± 0.14 <sup>a</sup>  | 2642.5 ± 1.30 <sup>b</sup>   | 1283.6 ± 23.21 <sup>c</sup>   | 439.8 ± 67.33 <sup>b</sup>  |
| <i>L. plantarum</i> | 30          | 5.51 ± 0.14 <sup>a</sup>  | 5.99 ± 0.01 <sup>ab</sup> | 2485.1 ± 12.90 <sup>c</sup>  | 1516.6 ± 153.76 <sup>bc</sup> | 511.5 ± 40.51 <sup>ab</sup> |
| <i>C. boidinii</i>  | 30          | 4.81 ± 0.01 <sup>bc</sup> | 5.60 ± 0.28 <sup>b</sup>  | 3135.5 ± 5.23 <sup>ab</sup>  | 2190.2 ± 155.64 <sup>ab</sup> | 679.4 ± 9.71 <sup>a</sup>   |
| <i>W. anomalous</i> | 30          | 4.59 ± 0.01 <sup>cd</sup> | 5.95 ± 0.08 <sup>ab</sup> | 3241.9 ± 0.13 <sup>a</sup>   | 2630.4 ± 44.05 <sup>a</sup>   | 537.8 ± 9.71 <sup>ab</sup>  |
| <i>L.p+ W.a</i>     | 30          | 4.55 ± 0.07 <sup>d</sup>  | 6.07 ± 0.09 <sup>ab</sup> | 2555.9 ± 4.30 <sup>b</sup>   | 1622.1 ± 80.47 <sup>bc</sup>  | 529.0 ± 12.03 <sup>ab</sup> |
| <i>L.p+C.b</i>      | 30          | 4.71 ± 0.01 <sup>cd</sup> | 6.05 ± 0.07 <sup>ab</sup> | 2335.6 ± 5.34 <sup>d</sup>   | 1560.0 ± 80.26 <sup>bc</sup>  | 508.6 ± 5.84 <sup>ab</sup>  |
| <i>L.p+W.a+C.b</i>  | 30          | 4.63 ± 0.05 <sup>cd</sup> | 6.34 ± 0.01 <sup>a</sup>  | 3129.7 ± 4.63 <sup>ab</sup>  | 1543.3 ± 244.36 <sup>bc</sup> | 539.4 ± 3.24 <sup>ab</sup>  |
|                     |             | **                        | *                         | **                           | *                             | *                           |
| <b>Trial II</b>     |             |                           |                           |                              |                               |                             |
| <i>Control</i>      | 0           | 5.36 ± 0.02 <sup>ab</sup> | 7.88 ± 0.16 <sup>bc</sup> | 3773.7 ± 7.26 <sup>a</sup>   | 727.6 ± 39.38 <sup>bc</sup>   | 382.5 ± 3.54 <sup>b</sup>   |
| <i>L. plantarum</i> | 0           | 5.30 ± 0.14 <sup>ab</sup> | 7.67 ± 0.06 <sup>c</sup>  | 3655.2 ± 0.55 <sup>b</sup>   | 479.3 ± 31.42 <sup>d</sup>    | 262.0 ± 7.25 <sup>cd</sup>  |
| <i>C. boidinii</i>  | 0           | 5.30 ± 0.01 <sup>ab</sup> | 8.05 ± 0.07 <sup>b</sup>  | 3271.4 ± 14.62 <sup>c</sup>  | 616.6 ± 60.40 <sup>c</sup>    | 245.4 ± 12.34 <sup>d</sup>  |
| <i>W. anomalous</i> | 0           | 5.47 ± 0.03 <sup>a</sup>  | 8.01 ± 0.01 <sup>b</sup>  | 3778.9 ± 12.59 <sup>a</sup>  | 402.8 ± 0.08 <sup>d</sup>     | 528.4 ± 0.39 <sup>a</sup>   |
| <i>L.p+ W.a</i>     | 0           | 5.20 ± 0.01 <sup>b</sup>  | 7.84 ± 0.08 <sup>bc</sup> | 3653.1 ± 5.48 <sup>b</sup>   | 802.3 ± 12.26 <sup>ab</sup>   | 332.8 ± 47.82 <sup>bc</sup> |
| <i>L.p+C.b</i>      | 0           | 5.37 ± 0.01 <sup>ab</sup> | 8.56 ± 0.01 <sup>a</sup>  | 2957.8 ± 10.03 <sup>c</sup>  | 874.3 ± 3.34 <sup>a</sup>     | 245.1 ± 10.16 <sup>d</sup>  |
| <i>L.p+W.a+C.b</i>  | 0           | 5.32 ± 0.02 <sup>ab</sup> | 8.06 ± 0.08 <sup>b</sup>  | 3077.2 ± 1.13 <sup>d</sup>   | 765.9 ± 33.78 <sup>ab</sup>   | 299.8 ± 5.06 <sup>cd</sup>  |
|                     |             | *                         | **                        | **                           | **                            | **                          |
| <i>Control</i>      | 8           | 4.35 ± 0.07 <sup>a</sup>  | 6.47 ± 0.04 <sup>a</sup>  | 2992.6 ± 1.85 <sup>d</sup>   | 526.2 ± 4.64 <sup>bcd</sup>   | 166.2 ± 3.79 <sup>c</sup>   |
| <i>L. plantarum</i> | 8           | 3.97 ± 0.01 <sup>c</sup>  | 5.64 ± 0.06 <sup>c</sup>  | 3005.1 ± 7.29 <sup>c</sup>   | 594.7 ± 0.49 <sup>bc</sup>    | 211.2 ± 22.84 <sup>b</sup>  |
| <i>C. boidinii</i>  | 8           | 4.05 ± 0.01 <sup>c</sup>  | 6.05 ± 0.07 <sup>cd</sup> | 3201.8 ± 1.12 <sup>d</sup>   | 306.1 ± 0.16 <sup>d</sup>     | 120.0 ± 0.05 <sup>d</sup>   |
| <i>W. anomalous</i> | 8           | 3.97 ± 0.01 <sup>c</sup>  | 5.89 ± 0.01 <sup>d</sup>  | 3261.9 ± 4.15 <sup>b</sup>   | 393.2 ± 5.78 <sup>cd</sup>    | 121.7 ± 1.11 <sup>d</sup>   |
| <i>L.p+ W.a</i>     | 8           | 4.18 ± 0.01 <sup>b</sup>  | 5.50 ± 0.01 <sup>c</sup>  | 3200.7 ± 3.78 <sup>d</sup>   | 1064.9 ± 15.22 <sup>a</sup>   | 280.8 ± 4.01 <sup>a</sup>   |
| <i>L.p+C.b</i>      | 8           | 3.98 ± 0.01 <sup>c</sup>  | 6.16 ± 0.08 <sup>bc</sup> | 3024.1 ± 28.40 <sup>c</sup>  | 314.2 ± 146.37 <sup>d</sup>   | 171.8 ± 4.39 <sup>c</sup>   |
| <i>L.p+W.a+C.b</i>  | 8           | 3.99 ± 0.01 <sup>c</sup>  | 6.36 ± 0.05 <sup>ab</sup> | 3379.5 ± 26.15 <sup>a</sup>  | 666.9 ± 12.83 <sup>b</sup>    | 142.8 ± 3.70 <sup>cd</sup>  |
|                     |             | **                        | **                        | **                           | **                            | **                          |
| <i>Control</i>      | 30          | 6.29 ± 0.01 <sup>a</sup>  | 6.50 ± 0.01 <sup>a</sup>  | 2796.7 ± 1.85 <sup>c</sup>   | 330.7 ± 2.17 <sup>d</sup>     | 129.5 ± 0.34 <sup>b</sup>   |
| <i>L. plantarum</i> | 30          | 4.15 ± 0.07 <sup>e</sup>  | 5.64 ± 0.02 <sup>c</sup>  | 3577.6 ± 12.40 <sup>a</sup>  | 840.3 ± 6.68 <sup>b</sup>     | 126.0 ± 1.38 <sup>b</sup>   |
| <i>C. boidinii</i>  | 30          | 5.57 ± 0.01 <sup>b</sup>  | 5.84 ± 0.06 <sup>bc</sup> | 3267.2 ± 2.28 <sup>c</sup>   | 979.2 ± 8.26 <sup>b</sup>     | 87.0 ± 0.27 <sup>cd</sup>   |
| <i>W. anomalous</i> | 30          | 5.64 ± 0.06 <sup>b</sup>  | 5.94 ± 0.08 <sup>b</sup>  | 3160.4 ± 41.87 <sup>d</sup>  | 596.3 ± 89.00 <sup>c</sup>    | 141.4 ± 1.63 <sup>b</sup>   |
| <i>L.p+ W.a</i>     | 30          | 5.04 ± 0.06 <sup>c</sup>  | 5.68 ± 0.11 <sup>c</sup>  | 3364.1 ± 25.20 <sup>bc</sup> | 1235.6 ± 38.93 <sup>a</sup>   | 306.2 ± 12.98 <sup>a</sup>  |
| <i>L.p+C.b</i>      | 30          | 4.54 ± 0.06 <sup>d</sup>  | 6.05 ± 0.07 <sup>b</sup>  | 3426.8 ± 16.75 <sup>b</sup>  | 810.7 ± 87.83 <sup>b</sup>    | 67.5 ± 0.85 <sup>d</sup>    |
| <i>L.p+W.a+C.b</i>  | 30          | 5.59 ± 0.01 <sup>b</sup>  | 6.36 ± 0.01 <sup>a</sup>  | 3348.4 ± 39.05 <sup>bc</sup> | 827.2 ± 12.99 <sup>b</sup>    | 100.3 ± 0.11 <sup>c</sup>   |
|                     |             | **                        | **                        | **                           | **                            | **                          |

Data are expressed as Log CFU/mL mean ± standard deviations. Mean values with different letters within the same column at the same time interval are statistically different. N.s. not significant; \*Significance at P < 0.05; \*\*Significance at P < 0.01.

Table S2

| Sample              | Time (days) | LAB                       | Yeasts and moulds         | Aerobic mesophilic bacteria | Enterobacteriaceae         | Staphylococci             |
|---------------------|-------------|---------------------------|---------------------------|-----------------------------|----------------------------|---------------------------|
| <b>Trial I</b>      |             |                           |                           |                             |                            |                           |
| <i>Control</i>      | 0           | 5.23 ± 0.01 <sup>d</sup>  | 6.50 ± 0.04 <sup>b</sup>  | 6.29 ± 0.16 <sup>d</sup>    | 6.90 ± 0.01 <sup>a</sup>   | 1.06 ± 0.03 <sup>e</sup>  |
| <i>L. plantarum</i> | 0           | 5.85 ± 0.02 <sup>a</sup>  | 5.69 ± 0.01 <sup>e</sup>  | 7.36 ± 0.03 <sup>a</sup>    | 6.94 ± 0.01 <sup>a</sup>   | 1.06 ± 0.03 <sup>e</sup>  |
| <i>C. boidinii</i>  | 0           | 5.31 ± 0.01 <sup>c</sup>  | 5.49 ± 0.01 <sup>f</sup>  | 5.96 ± 0.01 <sup>e</sup>    | 6.79 ± 0.01 <sup>b</sup>   | 3.98 ± 0.03 <sup>b</sup>  |
| <i>W. anomalus</i>  | 0           | 4.78 ± 0.04 <sup>f</sup>  | 5.48 ± 0.01 <sup>f</sup>  | 7.06 ± 0.08 <sup>b</sup>    | 6.57 ± 0.03 <sup>c</sup>   | 2.63 ± 0.21 <sup>d</sup>  |
| <i>L.p+W.a</i>      | 0           | 5.48 ± 0.02 <sup>b</sup>  | 6.19 ± 0.02 <sup>d</sup>  | 6.85 ± 0.01 <sup>bc</sup>   | 6.33 ± 0.01 <sup>d</sup>   | 4.79 ± 0.01 <sup>a</sup>  |
| <i>L.p+C.b</i>      | 0           | 5.30 ± 0.04 <sup>c</sup>  | 6.96 ± 0.01 <sup>a</sup>  | 6.72 ± 0.03 <sup>c</sup>    | 6.36 ± 0.02 <sup>d</sup>   | 3.30 ± 0.01 <sup>c</sup>  |
| <i>L.p+W.a+C.b</i>  | 0           | 5.15 ± 0.12 <sup>e</sup>  | 6.28 ± 0.03 <sup>c</sup>  | 7.50 ± 0.04 <sup>a</sup>    | 6.57 ± 0.01 <sup>c</sup>   | 4.59 ± 0.16 <sup>a</sup>  |
|                     |             | **                        | **                        | **                          | **                         | **                        |
| <i>Control</i>      | 8           | 6.74 ± 0.03 <sup>a</sup>  | 8.15 ± 0.21 <sup>a</sup>  | 8.15 ± 0.21 <sup>a</sup>    | 5.00 ± 0.01 <sup>bc</sup>  | 1.63 ± 0.40               |
| <i>L. plantarum</i> | 8           | 6.60 ± 0.01 <sup>c</sup>  | 6.88 ± 0.04 <sup>b</sup>  | 6.83 ± 0.01 <sup>b</sup>    | 4.61 ± 0.01 <sup>c</sup>   | 3.30 ± 0.43               |
| <i>C. boidinii</i>  | 8           | 6.59 ± 0.01 <sup>c</sup>  | 7.06 ± 0.05 <sup>b</sup>  | 6.43 ± 0.07 <sup>b</sup>    | 0.00 ± 0.01 <sup>d</sup>   | 4.29 ± 0.01               |
| <i>W. anomalus</i>  | 8           | 6.37 ± 0.02 <sup>c</sup>  | 6.85 ± 0.01 <sup>b</sup>  | 6.77 ± 0.01 <sup>c</sup>    | 6.02 ± 0.03 <sup>ab</sup>  | 3.00 ± 0.41               |
| <i>L.p+W.a</i>      | 8           | 6.74 ± 0.05 <sup>a</sup>  | 7.28 ± 0.16 <sup>b</sup>  | 5.08 ± 0.01 <sup>d</sup>    | 4.85 ± 0.01 <sup>c</sup>   | 3.88 ± 0.03               |
| <i>L.p+C.b</i>      | 8           | 6.62 ± 0.08 <sup>b</sup>  | 7.28 ± 0.31 <sup>b</sup>  | 6.57 ± 0.01 <sup>bc</sup>   | 5.34 ± 0.06 <sup>abc</sup> | 4.37 ± 0.27               |
| <i>L.p+W.a+C.b</i>  | 8           | 6.48 ± 0.01 <sup>d</sup>  | 6.98 ± 0.01 <sup>b</sup>  | 5.35 ± 0.01 <sup>d</sup>    | 6.17 ± 0.74 <sup>a</sup>   | 4.12 ± 0.07               |
|                     |             | **                        | *                         | **                          | **                         | n.s                       |
| <i>Control</i>      | 30          | 6.43 ± 0.01 <sup>a</sup>  | 6.56 ± 0.17 <sup>b</sup>  | 6.07 ± 0.01 <sup>c</sup>    | 2.23 ± 0.34 <sup>a</sup>   | 3.05 ± 0.06 <sup>a</sup>  |
| <i>L. plantarum</i> | 30          | 5.32 ± 0.05 <sup>bc</sup> | 6.35 ± 0.15 <sup>bc</sup> | 7.00 ± 0.01 <sup>a</sup>    | 0.00 ± 0.00 <sup>b</sup>   | 0.00 ± 0.00 <sup>b</sup>  |
| <i>C. boidinii</i>  | 30          | 4.78 ± 0.06 <sup>c</sup>  | 6.04 ± 0.15 <sup>bc</sup> | 5.72 ± 0.03 <sup>d</sup>    | 0.00 ± 0.00 <sup>b</sup>   | 0.00 ± 0.00 <sup>b</sup>  |
| <i>W. anomalus</i>  | 30          | 6.89 ± 0.09 <sup>a</sup>  | 6.33 ± 0.01 <sup>bc</sup> | 6.23 ± 0.02 <sup>c</sup>    | 0.00 ± 0.00 <sup>b</sup>   | 0.00 ± 0.00 <sup>b</sup>  |
| <i>L.p+W.a</i>      | 30          | 6.05 ± 0.02 <sup>ab</sup> | 5.77 ± 0.10 <sup>d</sup>  | 6.05 ± 0.08 <sup>c</sup>    | 0.00 ± 0.00 <sup>b</sup>   | 0.00 ± 0.00 <sup>b</sup>  |
| <i>L.p+C.b</i>      | 30          | 6.44 ± 0.04 <sup>a</sup>  | 6.41 ± 0.08 <sup>bc</sup> | 6.07 ± 0.10 <sup>c</sup>    | 0.00 ± 0.00 <sup>b</sup>   | 0.00 ± 0.00 <sup>b</sup>  |
| <i>L.p+W.a+C.b</i>  | 30          | 7.03 ± 0.01 <sup>a</sup>  | 7.71 ± 0.01 <sup>a</sup>  | 6.64 ± 0.01 <sup>b</sup>    | 0.00 ± 0.00 <sup>b</sup>   | 0.00 ± 0.00 <sup>b</sup>  |
|                     |             | *                         | **                        | **                          | **                         | **                        |
| <b>Trial II</b>     |             |                           |                           |                             |                            |                           |
| <i>Control</i>      | 0           | 1.30 ± 0.01 <sup>c</sup>  | 2.48 ± 0.01 <sup>c</sup>  | 5.38 ± 0.55 <sup>bc</sup>   | 0.00 ± 0.00 <sup>d</sup>   | 0.00 ± 0.00 <sup>f</sup>  |
| <i>L. plantarum</i> | 0           | 5.80 ± 0.17 <sup>a</sup>  | 5.41 ± 0.12 <sup>ab</sup> | 4.15 ± 0.21 <sup>e</sup>    | 2.14 ± 0.09 <sup>ab</sup>  | 1.06 ± 0.03 <sup>e</sup>  |
| <i>C. boidinii</i>  | 0           | 5.75 ± 0.03 <sup>a</sup>  | 5.51 ± 0.77 <sup>ab</sup> | 4.23 ± 0.34 <sup>de</sup>   | 2.88 ± 0.02 <sup>a</sup>   | 3.97 ± 0.03 <sup>b</sup>  |
| <i>W. anomalus</i>  | 0           | 2.00 ± 0.01 <sup>d</sup>  | 4.82 ± 0.01 <sup>ab</sup> | 5.26 ± 0.38 <sup>cde</sup>  | 1.09 ± 0.12 <sup>c</sup>   | 2.65 ± 0.21 <sup>d</sup>  |
| <i>L.p+ W.a</i>     | 0           | 4.77 ± 0.01 <sup>c</sup>  | 4.64 ± 0.29 <sup>ab</sup> | 5.65 ± 0.11 <sup>ab</sup>   | 2.77 ± 0.49 <sup>a</sup>   | 4.79 ± 0.01 <sup>a</sup>  |
| <i>L.p.+C.b</i>     | 0           | 5.00 ± 0.00 <sup>bc</sup> | 4.20 ± 0.04 <sup>c</sup>  | 7.62 ± 0.04 <sup>a</sup>    | 1.60 ± 0.09 <sup>bc</sup>  | 3.30 ± 0.01 <sup>c</sup>  |
| <i>L.p+W.a+C.b</i>  | 0           | 5.31 ± 0.20 <sup>b</sup>  | 5.58 ± 0.19 <sup>a</sup>  | 6.71 ± 0.02 <sup>ab</sup>   | 1.02 ± 0.03 <sup>c</sup>   | 4.84 ± 0.28 <sup>a</sup>  |
|                     |             | *                         | **                        | **                          | **                         | **                        |
| <i>Control</i>      | 8           | 5.43 ± 0.45 <sup>b</sup>  | 5.92 ± 0.04 <sup>b</sup>  | 7.38 ± 0.55 <sup>a</sup>    | 5.26 ± 0.58                | 4.60 ± 0.16 <sup>b</sup>  |
| <i>L. plantarum</i> | 8           | 7.91 ± 0.01 <sup>a</sup>  | 7.84 ± 0.09 <sup>a</sup>  | 5.82 ± 0.18 <sup>b</sup>    | 4.17 ± 0.21                | 0.00 ± 0.00 <sup>d</sup>  |
| <i>C. boidinii</i>  | 8           | 7.50 ± 0.04 <sup>a</sup>  | 7.61 ± 0.01 <sup>a</sup>  | 7.36 ± 0.51 <sup>a</sup>    | 4.20 ± 0.24                | 3.00 ± 0.00 <sup>c</sup>  |
| <i>W. anomalus</i>  | 8           | 7.91 ± 0.01 <sup>a</sup>  | 7.50 ± 0.65 <sup>a</sup>  | 7.84 ± 0.09 <sup>a</sup>    | 4.39 ± 0.43                | 3.39 ± 0.43 <sup>c</sup>  |
| <i>L.p+W.a</i>      | 8           | 7.58 ± 0.17 <sup>a</sup>  | 7.47 ± 0.49 <sup>a</sup>  | 7.49 ± 0.02 <sup>a</sup>    | 4.38 ± 0.41                | 4.38 ± 0.41 <sup>b</sup>  |
| <i>L.p.+C.b</i>     | 8           | 7.62 ± 0.01 <sup>a</sup>  | 7.00 ± 0.21 <sup>ab</sup> | 7.00 ± 0.01 <sup>a</sup>    | 4.60 ± 0.01                | 3.90 ± 0.03 <sup>bc</sup> |
| <i>L.p+W.a+C.b</i>  | 8           | 7.61 ± 0.02 <sup>a</sup>  | 7.85 ± 0.19 <sup>a</sup>  | 5.30 ± 0.01 <sup>b</sup>    | 4.04 ± 0.06                | 5.72 ± 0.03 <sup>a</sup>  |
|                     |             | **                        | *                         | **                          | n.s                        | **                        |
| <i>Control</i>      | 30          | 7.77 ± 0.01 <sup>a</sup>  | 7.84 ± 0.01 <sup>d</sup>  | 7.75 ± 0.01 <sup>b</sup>    | 0.00 ± 0.00                | 0.00 ± 0.00               |
| <i>L. plantarum</i> | 30          | 7.36 ± 0.08 <sup>a</sup>  | 7.29 ± 0.02 <sup>f</sup>  | 7.30 ± 0.01 <sup>c</sup>    | 0.00 ± 0.00                | 0.00 ± 0.00               |
| <i>C. boidinii</i>  | 30          | 7.72 ± 0.03 <sup>a</sup>  | 8.00 ± 0.01 <sup>c</sup>  | 7.31 ± 0.01 <sup>c</sup>    | 0.00 ± 0.00                | 0.00 ± 0.00               |
| <i>W. anomalus</i>  | 30          | 5.00 ± 0.01 <sup>b</sup>  | 6.00 ± 0.01 <sup>e</sup>  | 7.86 ± 0.03 <sup>a</sup>    | 0.00 ± 0.00                | 0.00 ± 0.00               |
| <i>L.p+W.a</i>      | 30          | 8.44 ± 0.66 <sup>a</sup>  | 8.77 ± 0.02 <sup>b</sup>  | 7.30 ± 0.01 <sup>c</sup>    | 0.00 ± 0.00                | 0.00 ± 0.00               |
| <i>L.p+C.b</i>      | 30          | 7.80 ± 0.04 <sup>a</sup>  | 9.00 ± 0.01 <sup>a</sup>  | 7.86 ± 0.01 <sup>a</sup>    | 0.00 ± 0.00                | 0.00 ± 0.00               |
| <i>L.p+W.a+C.b</i>  | 30          | 7.30 ± 0.01 <sup>a</sup>  | 7.43 ± 0.03 <sup>e</sup>  | 7.31 ± 0.03 <sup>c</sup>    | 0.00 ± 0.00                | 0.00 ± 0.00               |
|                     |             | **                        | **                        | **                          | n.s                        | n.s                       |

Data are expressed as Log CFU/mL mean ± standard deviations. Mean values with different letters within the same column at the same time interval are statistically different. N.s. not significant; \*Significance at P < 0.05; \*\*Significance at P < 0.01.

**Table S3**

| Samples                              | Concentration of HT<br>(mg/L) | Inhibition<br><i>o</i> COX-1 (%) | Inhibition<br><i>h</i> COX-2 (%) |
|--------------------------------------|-------------------------------|----------------------------------|----------------------------------|
| <i>Control</i>                       | 6.80                          | 0.00                             | 0.00                             |
| <i>L.planturum</i>                   | 37.02                         | 5.09                             | 0.00                             |
| <i>C. boidinii</i>                   | 36.09                         | 15.96                            | 12.95                            |
| <i>W. anomalus</i>                   | 31.72                         | 1.32                             | 3.27                             |
| <i>L.p</i> + <i>W.a</i>              | 32.06                         | 0.19                             | 0.86                             |
| <i>L.p</i> + <i>C.b</i>              | 36.13                         | 8.20                             | 0.00                             |
| <i>L.p</i> + <i>W.a</i> + <i>C.b</i> | 30.71                         | 0.00                             | 5.78                             |
